# Supplementary material
Source: Springer Nature journal article supplement (https://www.springermedizin.de/resource/supplementary/12986_2011_449_MOESM3_ESM.pdf/25656148)

**A**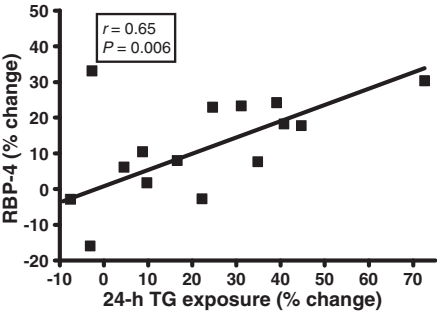**B**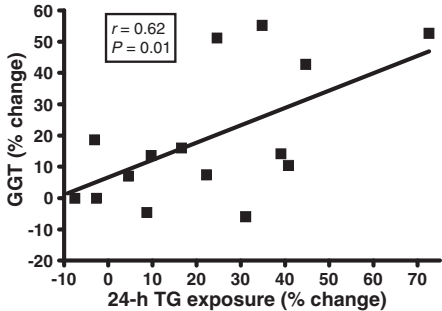

Supplement: MOESM3 [file 25656148]
